# Supplementary material
Source: HighWire-hosted journal article supplement (https://bmjopen.bmj.com/content/6/10/e012840)
Supplement: inline-supplementary-material-2 [file inline-supplementary-material-2.pdf]

## **APPENDIX 2**

### **Medline search strategy to identify randomised controlled and controlled trials published since 2011**

**Search date:** 05 February 2016

Changes to Terms & Conditions: We have made changes to our Terms and Conditions for using NICE Websites. Cookies will be used in the following ways:

Analytical purposes - for monitoring usage of the NICE websites in order to improve our services.  
Your preferences - to remember what you view on our websites and to enable us to tailor our services to you.

☐ By checking this box you are agreeing to the NICE Terms and Conditions and our use of cookies. For more details about how we use cookies see our [Terms and Conditions](#).

Evidence Search Journals and Databases nhsdpindus001

## NICE Healthcare Databases Advanced Search

Select Database Saved Searches Search Recover Searches Alerts My OpenAthens Account

Home » Database select » Search and Limits

| <input type="checkbox"/> Select All Save all Save selected lines Delete selected Remove duplicates ? Collapse history ▲ |          |                                       |                          |
|-------------------------------------------------------------------------------------------------------------------------|----------|---------------------------------------|--------------------------|
| Line                                                                                                                    | Database | Search Term                           | View Results             |
| <input type="checkbox"/> 1                                                                                              | Medline  | "general practice".ti,ab              | 33800 Apply Limits Sub   |
| <input type="checkbox"/> 2                                                                                              | Medline  | "family practice".ti,ab               | 7546 Apply Limits Sub    |
| <input type="checkbox"/> 3                                                                                              | Medline  | "primary care".ti,ab                  | 79525 Apply Limits Sub   |
| <input type="checkbox"/> 4                                                                                              | Medline  | "general physician".ti,ab             | 1374 Apply Limits Sub    |
| <input type="checkbox"/> 5                                                                                              | Medline  | "general practitioner".ti,ab          | 39819 Apply Limits Sub   |
| <input type="checkbox"/> 6                                                                                              | Medline  | "family doctor".ti,ab                 | 3904 Apply Limits Sub    |
| <input type="checkbox"/> 7                                                                                              | Medline  | "family physician".ti,ab              | 12321 Apply Limits Sub   |
| <input type="checkbox"/> 8                                                                                              | Medline  | "community care".ti,ab                | 3365 Apply Limits Sub    |
| <input type="checkbox"/> 9                                                                                              | Medline  | "community health service".ti,ab      | 889 Apply Limits Sub     |
| <input type="checkbox"/> 10                                                                                             | Medline  | "home care".ti,ab                     | 14784 Apply Limits Sub   |
| <input type="checkbox"/> 11                                                                                             | Medline  | homecare.ti,ab                        | 765 Apply Limits Sub     |
| <input type="checkbox"/> 12                                                                                             | Medline  | "postdischarge rehabilitation".ti,ab  | 15 Apply Limits Sub      |
| <input type="checkbox"/> 13                                                                                             | Medline  | "post-discharge rehabilitation".ti,ab | 13 Apply Limits Sub      |
| <input type="checkbox"/> 14                                                                                             | Medline  | "postdischarge care".ti,ab            | 133 Apply Limits Sub     |
| <input type="checkbox"/> 15                                                                                             | Medline  | "post-discharge care".ti,ab           | 107 Apply Limits Sub     |
| <input type="checkbox"/> 16                                                                                             | Medline  | "postdischarge service".ti,ab         | 21 Apply Limits Sub      |
| <input type="checkbox"/> 17                                                                                             | Medline  | "post-discharge service".ti,ab        | 24 Apply Limits Sub      |
| <input type="checkbox"/> 18                                                                                             | Medline  | "longterm rehabilitation".ti,ab       | 9 Apply Limits Sub       |
| <input type="checkbox"/> 19                                                                                             | Medline  | "long-term rehabilitation".ti,ab      | 349 Apply Limits Sub     |
| <input type="checkbox"/> 20                                                                                             | Medline  | "longterm care".ti,ab                 | 71 Apply Limits Sub      |
| <input type="checkbox"/> 21                                                                                             | Medline  | "long-term care".ti,ab                | 15559 Apply Limits Sub   |
| <input type="checkbox"/> 22                                                                                             | Medline  | exp FAMILY PRACTICE/                  | 62354 Apply Limits Sub   |
| <input type="checkbox"/> 23                                                                                             | Medline  | exp PRIMARY HEALTH CARE/              | 111215 Apply Limits Sub  |
| <input type="checkbox"/> 24                                                                                             | Medline  | exp PHYSICIANS.FAMILY/                | 15245 Apply Limits Sub   |
| <input type="checkbox"/> 25                                                                                             | Medline  | exp COMMUNITY HEALTH SERVICES/        | 261424 Apply Limits Sub  |
| <input type="checkbox"/> 26                                                                                             | Medline  | exp HOME CARE SERVICES/               | 41522 Apply Limits Sub   |
| <input type="checkbox"/> 27                                                                                             | Medline  | stroke*.ti,ab                         | 170747 Apply Limits Sub  |
| <input type="checkbox"/> 28                                                                                             | Medline  | "cerebrovascular accident".ti,ab      | 5462 Apply Limits Sub    |
| <input type="checkbox"/> 29                                                                                             | Medline  | CVA*.ti,ab                            | 3031 Apply Limits Sub    |
| <input type="checkbox"/> 30                                                                                             | Medline  | "cerebral stroke".ti,ab               | 1222 Apply Limits Sub    |
| <input type="checkbox"/> 31                                                                                             | Medline  | exp STROKE/ OR exp STROKE.LACUNAR/    | 96874 Apply Limits Sub   |
| <input type="checkbox"/> 32                                                                                             | Medline  | carer*.ti,ab                          | 9267 Apply Limits Sub    |
| <input type="checkbox"/> 33                                                                                             | Medline  | caregiver*.ti,ab                      | 37285 Apply Limits Sub   |
| <input type="checkbox"/> 34                                                                                             | Medline  | family.ti,ab                          | 591231 Apply Limits Sub  |
| <input type="checkbox"/> 35                                                                                             | Medline  | patient*.ti,ab                        | 4998338 Apply Limits Sub |

<http://www.library.nhs.uk/hdas/savedsearchrerun/2715967?RunOnCurrent=True&Sea...> 05/02/2016

|                          |    |         |                                                                                                                                                                                                                                                                                                                                                                                                                                                                                                |          |              |     |
|--------------------------|----|---------|------------------------------------------------------------------------------------------------------------------------------------------------------------------------------------------------------------------------------------------------------------------------------------------------------------------------------------------------------------------------------------------------------------------------------------------------------------------------------------------------|----------|--------------|-----|
| <input type="checkbox"/> | 36 | Medline | survivor*.ti,ab                                                                                                                                                                                                                                                                                                                                                                                                                                                                                | 70893    | Apply Limits | Sub |
| <input type="checkbox"/> | 37 | Medline | "stroke survivor".ti,ab                                                                                                                                                                                                                                                                                                                                                                                                                                                                        | 2778     | Apply Limits | Sub |
| <input type="checkbox"/> | 38 | Medline | exp CAREGIVERS/                                                                                                                                                                                                                                                                                                                                                                                                                                                                                | 24119    | Apply Limits | Sub |
| <input type="checkbox"/> | 39 | Medline | "randomized controlled trial".pt                                                                                                                                                                                                                                                                                                                                                                                                                                                               | 404274   | Apply Limits | Sub |
| <input type="checkbox"/> | 40 | Medline | "controlled clinical trial".pt                                                                                                                                                                                                                                                                                                                                                                                                                                                                 | 89954    | Apply Limits | Sub |
| <input type="checkbox"/> | 41 | Medline | randomized.ti,ab                                                                                                                                                                                                                                                                                                                                                                                                                                                                               | 426231   | Apply Limits | Sub |
| <input type="checkbox"/> | 42 | Medline | placebo.ti,ab                                                                                                                                                                                                                                                                                                                                                                                                                                                                                  | 169782   | Apply Limits | Sub |
| <input type="checkbox"/> | 43 | Medline | DRUG THERAPY/                                                                                                                                                                                                                                                                                                                                                                                                                                                                                  | 1835584  | Apply Limits | Sub |
| <input type="checkbox"/> | 44 | Medline | randomly.ti,ab                                                                                                                                                                                                                                                                                                                                                                                                                                                                                 | 240849   | Apply Limits | Sub |
| <input type="checkbox"/> | 45 | Medline | trial.ti,ab                                                                                                                                                                                                                                                                                                                                                                                                                                                                                    | 399774   | Apply Limits | Sub |
| <input type="checkbox"/> | 46 | Medline | groups.ti,ab                                                                                                                                                                                                                                                                                                                                                                                                                                                                                   | 1520610  | Apply Limits | Sub |
| <input type="checkbox"/> | 47 | Medline | 39 OR 40 OR 41 OR 42 OR 43 OR 44 OR 45 OR 46                                                                                                                                                                                                                                                                                                                                                                                                                                                   | 3706700  | Apply Limits | Sub |
| <input type="checkbox"/> | 48 | Medline | ANIMALS/                                                                                                                                                                                                                                                                                                                                                                                                                                                                                       | 5743944  | Apply Limits | Sub |
| <input type="checkbox"/> | 49 | Medline | HUMANS/                                                                                                                                                                                                                                                                                                                                                                                                                                                                                        | 15592284 | Apply Limits | Sub |
| <input type="checkbox"/> | 50 | Medline | 48 NOT 49                                                                                                                                                                                                                                                                                                                                                                                                                                                                                      | 4141468  | Apply Limits | Sub |
| <input type="checkbox"/> | 51 | Medline | 47 NOT 50                                                                                                                                                                                                                                                                                                                                                                                                                                                                                      | 3192637  | Apply Limits | Sub |
| <input type="checkbox"/> | 52 | Medline | "Clinical trial".pt                                                                                                                                                                                                                                                                                                                                                                                                                                                                            | 542886   | Apply Limits | Sub |
| <input type="checkbox"/> | 53 | Medline | exp CLINICAL TRIALS AS TOPIC/                                                                                                                                                                                                                                                                                                                                                                                                                                                                  | 285948   | Apply Limits | Sub |
| <input type="checkbox"/> | 54 | Medline | (clinic* ADJ9 trial*).ti,ab                                                                                                                                                                                                                                                                                                                                                                                                                                                                    | 272070   | Apply Limits | Sub |
| <input type="checkbox"/> | 55 | Medline | (mask* OR blind*).ti,ab                                                                                                                                                                                                                                                                                                                                                                                                                                                                        | 287551   | Apply Limits | Sub |
| <input type="checkbox"/> | 56 | Medline | PLACEBOS/AD, AE, AN, CS, CL, DU, EC, HI, IP, ME, PK, PD, PO, RE, ST, SD, TU, TO, CH, CT<br>[AD=administration & dosage, AE=adverse effects, AN=analysis, CS=chemical synthesis,<br>CL=classification, DU=diagnostic use, EC=economics, HI=history, IP=isolation & purification,<br>ME=metabolism, PK=pharmacokinetics, PD=pharmacology, PO=poisoning, RE=radiation effects,<br>ST=standards, SD=supply & distribution, TU=therapeutic use, TO=toxicity, CH=chemistry,<br>CT=contraindications] | 2174     | Apply Limits | Sub |
| <input type="checkbox"/> | 57 | Medline | placebo*.ti,ab                                                                                                                                                                                                                                                                                                                                                                                                                                                                                 | 170659   | Apply Limits | Sub |
| <input type="checkbox"/> | 58 | Medline | Random*.ti,ab                                                                                                                                                                                                                                                                                                                                                                                                                                                                                  | 798804   | Apply Limits | Sub |
| <input type="checkbox"/> | 59 | Medline | RESEARCH DESIGN/LJ, SN, ST, TD [LJ=legislation & jurisprudence, SN=statistics & numerical<br>data, ST=standards, TD=trends]                                                                                                                                                                                                                                                                                                                                                                    | 11888    | Apply Limits | Sub |
| <input type="checkbox"/> | 60 | Medline | (latin ADJ square).ti,ab                                                                                                                                                                                                                                                                                                                                                                                                                                                                       | 3833     | Apply Limits | Sub |
| <input type="checkbox"/> | 61 | Medline | 52 OR 53 OR 54 OR 55 OR 56 OR 57 OR 58 OR 59 OR 60                                                                                                                                                                                                                                                                                                                                                                                                                                             | 1590407  | Apply Limits | Sub |
| <input type="checkbox"/> | 62 | Medline | 61 NOT 50                                                                                                                                                                                                                                                                                                                                                                                                                                                                                      | 1465821  | Apply Limits | Sub |
| <input type="checkbox"/> | 63 | Medline | 1 OR 2 OR 3 OR 4 OR 5 OR 6 OR 7 OR 8 OR 9 OR 10 OR 11 OR 12 OR 13 OR 14 OR 15 OR<br>16 OR 17 OR 18 OR 19 OR 20 OR 21 OR 22 OR 23 OR 24 OR 25 OR 26                                                                                                                                                                                                                                                                                                                                             | 510994   | Apply Limits | Sub |
| <input type="checkbox"/> | 64 | Medline | 27 OR 28 OR 29 OR 30 OR 31                                                                                                                                                                                                                                                                                                                                                                                                                                                                     | 206686   | Apply Limits | Sub |
| <input type="checkbox"/> | 65 | Medline | 32 OR 33 OR 34 OR 35 OR 36 OR 37 OR 38                                                                                                                                                                                                                                                                                                                                                                                                                                                         | 5504288  | Apply Limits | Sub |
| <input type="checkbox"/> | 66 | Medline | 51 OR 62                                                                                                                                                                                                                                                                                                                                                                                                                                                                                       | 3632757  | Apply Limits | Sub |
| <input type="checkbox"/> | 67 | Medline | 63 AND 64 AND 65 AND 66                                                                                                                                                                                                                                                                                                                                                                                                                                                                        | 1798     | Apply Limits | Sub |
| <input type="checkbox"/> | 68 | Medline | 67 [Limit to: Publication Year 2011-2015]                                                                                                                                                                                                                                                                                                                                                                                                                                                      | 656      | Apply Limits | Sub |

☒ AND ☐ OR To combine two line numbers using NOT, enter the line numbers in the search box below: for example 1 NOT 2

You are currently searching Medline   or

|                                       |                                       |
|---------------------------------------|---------------------------------------|
| <input type="button" value="Search"/> | <input type="button" value="Limits"/> |
|---------------------------------------|---------------------------------------|

Search Keyword:  
Enter search words or line numbers in the box below. You may use AND, OR, NOT to combine search words.  
Use \* to search for word stems, "inverted commas" to search for phrases and round brackets () to nest words.

☒ Title and Abstract  
☐ Any field  
☐ Publication Type

IN  
☐ Journal Name \*  
☐ Abstract  
☐ Author \*

http://www.library.nhs.uk/hdas/savedsearchrerun/2715967?RunOnCurrent=True&Sea... 05/02/2016
